# Supplementary material for: Freshwater monitoring by nanopore sequencing
Source: eLife. 2021 Jan 19;10:e61504. doi: 10.7554/eLife.61504 (PMC7815314; doi:10.7554/eLife.61504)
Supplement: Supplementary file 7. [file elife-61504-supp7.xlsx]

## Sheet: Full-length 16S primers
Supplementary File 7
Full-length 16S primer sequences (5' - 3'); blue nucleotides indicate barcode region, italic nucleotides indicate primer binding sites.
Pair	Forward	Reverse
1	ATCGCCTACCGTGACAAGAAAGTTGTCGGTGTCTTTGTGAGAGTTTGATCMTGGCTCAG	ATCGCCTACCGTGACAAGAAAGTTGTCGGTGTCTTTGTGCGGTTACCTTGTTACGACTT
2	ATCGCCTACCGTGACTCGATTCCGTTTGTAGTCGTCTGTAGAGTTTGATCMTGGCTCAG	ATCGCCTACCGTGACTCGATTCCGTTTGTAGTCGTCTGTCGGTTACCTTGTTACGACTT
3	ATCGCCTACCGTGACGAGTCTTGTGTCCCAGTTACCAGGAGAGTTTGATCMTGGCTCAG	ATCGCCTACCGTGACGAGTCTTGTGTCCCAGTTACCAGGCGGTTACCTTGTTACGACTT
4	ATCGCCTACCGTGACTTCGGATTCTATCGTGTTTCCCTAAGAGTTTGATCMTGGCTCAG	ATCGCCTACCGTGACTTCGGATTCTATCGTGTTTCCCTACGGTTACCTTGTTACGACTT
5	ATCGCCTACCGTGACCTTGTCCAGGGTTTGTGTAACCTTAGAGTTTGATCMTGGCTCAG	ATCGCCTACCGTGACCTTGTCCAGGGTTTGTGTAACCTTCGGTTACCTTGTTACGACTT
6	ATCGCCTACCGTGACTTCTCGCAAAGGCAGAAAGTAGTCAGAGTTTGATCMTGGCTCAG	ATCGCCTACCGTGACTTCTCGCAAAGGCAGAAAGTAGTCCGGTTACCTTGTTACGACTT
7	ATCGCCTACCGTGACGTGTTACCGTGGGAATGAATCCTTAGAGTTTGATCMTGGCTCAG	ATCGCCTACCGTGACGTGTTACCGTGGGAATGAATCCTTCGGTTACCTTGTTACGACTT
8	ATCGCCTACCGTGACTTCAGGGAACAAACCAAGTTACGTAGAGTTTGATCMTGGCTCAG	ATCGCCTACCGTGACTTCAGGGAACAAACCAAGTTACGTCGGTTACCTTGTTACGACTT
9	ATCGCCTACCGTGACAACTAGGCACAGCGAGTCTTGGTTAGAGTTTGATCMTGGCTCAG	ATCGCCTACCGTGACAACTAGGCACAGCGAGTCTTGGTTCGGTTACCTTGTTACGACTT
10	ATCGCCTACCGTGACAAGCGTTGAAACCTTTGTCCTCTCAGAGTTTGATCMTGGCTCAG	ATCGCCTACCGTGACAAGCGTTGAAACCTTTGTCCTCTCCGGTTACCTTGTTACGACTT
11	ATCGCCTACCGTGACGTTTCATCTATCGGAGGGAATGGAAGAGTTTGATCMTGGCTCAG	ATCGCCTACCGTGACGTTTCATCTATCGGAGGGAATGGACGGTTACCTTGTTACGACTT
12	ATCGCCTACCGTGACCAGGTAGAAAGAAGCAGAATCGGAAGAGTTTGATCMTGGCTCAG	ATCGCCTACCGTGACCAGGTAGAAAGAAGCAGAATCGGACGGTTACCTTGTTACGACTT
